# Supplementary material for: Sucrose preferentially promotes expression of OsWRKY7 and OsPR10a to enhance defense response to blast fungus in rice
Source: Front Plant Sci. 2023 Jan 27;14:1117023. doi: 10.3389/fpls.2023.1117023 (PMC9911862; doi:10.3389/fpls.2023.1117023)
Supplement: Supplementary file 2 [file Table_1.xlsx]

## Sheet: Supplementary Table 1
Supplementary Table 1 List of primer used in qRT-PCR experiments
Locus ID	Primer name	Sequence (5' to 3') (Forward)	Sequence (5' to 3') (Reverse)
LOC_Os01g51690	WRKY26	TATCCGAGGAGCGTGGCT	CCGTACTTCCTCCACTTATAC
LOC_Os05g46020	WRKY7	ACCCAAGGAACTACTACCGGT	TCACGTGGTTGTGCGTCC
LOC_Os01g60600	WRKY108	CCGTTGGATTCGGATATACTAC	TTACAACACACAAGGTACATACG
LOC_Os12g36880	PR10a	CCGAATACGCCTAAGATGAAG	GACTCAAACGCCACGAGAAT
LOC_Os04g42520	APT2	CGATAGCCGGAGGAAGAAG	CCCATAAGACGATACAAGCGA
LOC_Os02g09510	UGT84C1	CAGTATCAAAGACCAAAGCTATC	CATGGCTAAGCAAGCTAAC
LOC_Os05g30790	CWZF5	CAGCTCACCTACATCGATGA	AGGAGAGCGCTGGTATGTAG
LOC_Os02g45420	ERF20	GCTAGCTATCAGTAGACCAG	CAAGTGAATCAGCAAGTGGAC
LOC_Os02g18470	NAC46	CCGACCAAGATTACTTCTATAC	AGAAACTGCTGCGAAGTCG
LOC_Os03g25480	CP450	ATGGACAAGCTAAAGGTGATGAC	TGCCGTCAAATCTTGGAACTG
LOC_Os03g20500	OsFbox-137	TGAGAGCGTAGAGTTGAGAAC	TCGGTGTGCCACTGAATCGA
LOC_Os07g02910	OsFbox333	TGCAGTGACCCATCCATTAAG	AGCACGGTCACATAGTACTC
LOC_Os10g21910	ACC1	AGCTCATAGTGGAGATAGCAG	TTCAGTGCGTCCGGAAGTTC
LOC_Os08g43190	OsDH1	GCCAGTTGGGCCTTATGATG	ATCACCATCGGCTCCTTCAC
LOC_Os01g71460	OsFBDUF11	GCCATCCTGTTTGGTTTGTGC	CTCTGGGTAACTAAAATCCCTTG
LOC_Os01g23760	OsMADS93	CGACACGCAATCCCAGAATTG	GTGCCACCGAATAGGTAATAC
LOC_Os02g15950	OsFBK5	ATCGGATTGAAGGATCTTGCG	ATGACCTGAGCACCAATGAAG
LOC_Os12g34310	OsFBX455	CAGTGGGCAAGCTGATCATAG	CACTTTGCAATGAGCTTGGCT
LOC_Os11g41860	OsFBX429	AGGACAGGGACCTGATGTG	GTCTCCAATATACTCGAGCAG
LOC_Os02g02320	OsSCP6	ACGACGCGAGGATGTTCTAC	TCGAGATGGTGAACGGGCCA
LOC_Os09g06770	Zinc finger	TGCCCAGCTAATCAATCATCATC	TACGTGAGTTTGCCTCTGTAC
LOC_Os09g25070	WRKY62	AAGAAGAAGCTCCAAAGATGTG	TGGCGACGAATTCGGTTGTC
LOC_Os06g39370	OsFbox314	ATCAAACACACCAAGCTCAGAC	AACCCCGGAATCAGCTCGT
LOC_Os02g56750	OsFbox115	AGGCTAGACGAGCATTTGATC	CACCACCTAGATGAGCCATG
LOC_Os02g41680	OsPAL	GCCAATCTGCTGAACTAGTG	GCTTGCCGCTATGCAACGA
LOC_Os09g19734	OsICS1	TATGGTGCTATCCGCTTCGAT	CGAGAACCGAGCTCTCTTC
LOC_Os01g09800	OsNH1	CACGCCTAAGCCTCGGATTA	GTGAGCAGCATCCTGACTAG
LOC_Os03g12500	OsAOS2	ATACGTGTACTGGTCGAATGG	AAGGTGTCGTACCGGAGGAA
LOC_Os03g32314	OsAOC1	ACGAGATCAACGAGCGCGA	TTCCGCTGTACAGCTTGTTG
LOC_Os06g11260	OsPR3	AGTCGCGGTGAGGATATCAC	ACGGCCATGCCGAGCTTAAT
LOC_Os07g03710	OsPR1a	GTATGCTATGCTACGTGTTTATGC	GCAAATACGGCTGACAGTACAG
LOC_Os01g28450	OsPR1b	ACGCCTTCACGGTCCATAC	CAGAAAGAAACAGAGGGAGTAC
LOC_Os05g36290	Actin1	ATCCTTGTATGCTAGCGGTCGA	ATCCAACCGGAGGATAGCATG
List of Primer for genotyping
	For gene specific (wild type)	GTGTCGGGTGCGTATTTAAAAAC	GGGAATTGGCGCTAAATCTGC
	For T-DNA	GTGTCGGGTGCGTATTTAAAAAC	ATCCAGACTGAATGCCCACAG
For CRISPR (OsWRKY7)
	OsWRKY7-target	GGCAATGTCATCGTACTTCTCCCA	AAACTGGGAGAAGTACGATGACAT
OsWRKY7-HA transgenic lines
	OsWRKY7-HA	ATTCGATATCAAGCTTTACTCGGCCATGGCGGCAG	ATTAACCCGCTGTTGAGCTCATTGAGAGAACCTGGCGGCTG
List of primers For ChIP Assay
	P1	acggagagatttatcaaagttagg	aaaatttccaccttgccacctc
	P2	gacgtacgtgctctggtac	cagtgatactcaatctgatgtc
	P3	tcactgagtctaccaattgaagg	cttttagatgataggtacgactac
	P4	cttaatttccacaggtcaagcca	atgctgaactttgtgtggaattc
	P5	gcaaccaatggagctgagttc	tcaaaggtgagcagtagcatg
List of primer used in vector construction for reporter assay
Locus ID	Primer name	Sequence (5' to 3') (Forward)	Sequence (5' to 3') (Reverse)
LOC_Os05g46021	pWRKY7-LUC	GGCCAGTGCCAAGCTCGACGCCCTATCCGATTC	TTTTTTATCAAAGCTGCGCGAAAGCTCCGTATT
LOC_Os12g36880	pPR10a-LUC	GGCCAGTGCCAAGCTCCATCTGCGACCAAATTTCAC	TTTTTTATCAAAGCTCACTGAAGATATAATCTAACTAGC
LOC_Os06g44010	Ubi-WRKY28-Myc	GGATCCACTAGTGTTAACATGGATTCGTGGATTGAGCAG	CTAGCCATAGATCCGGTACCGTTCTTGGTCGGCGAGAG
LOC_Os01g09100	Ubi-WRKY10-Myc	GGATCCACTAGTGTTAACATGGCGGCTTCGCTGGGAC	CTAGCCATAGATCCGGTACCGAACGACGATTCCGACGAGTG
LOC_Os05g46020	Ubi-WRKY7-Myc	GGATCCACTAGTGTTAACTACTCGGCCATGGCGGCAG	CTAGCCATAGATCCGGTACCATTGAGAGAACCTGGCGGCTG
List of primer used for EMSA
	MBP-OsWRKY7	AAGGATTTCAGAATTCTACTCGGCCATGGCGGCAG	TTGCCTGCAGGTCGACTTAATTGAGAGAACCTGGCGGCTG
